# Supplementary material
Source: ML conference proceedings conference paper supplement (https://openreview.net/forum?id=ufOWYDn9mB)

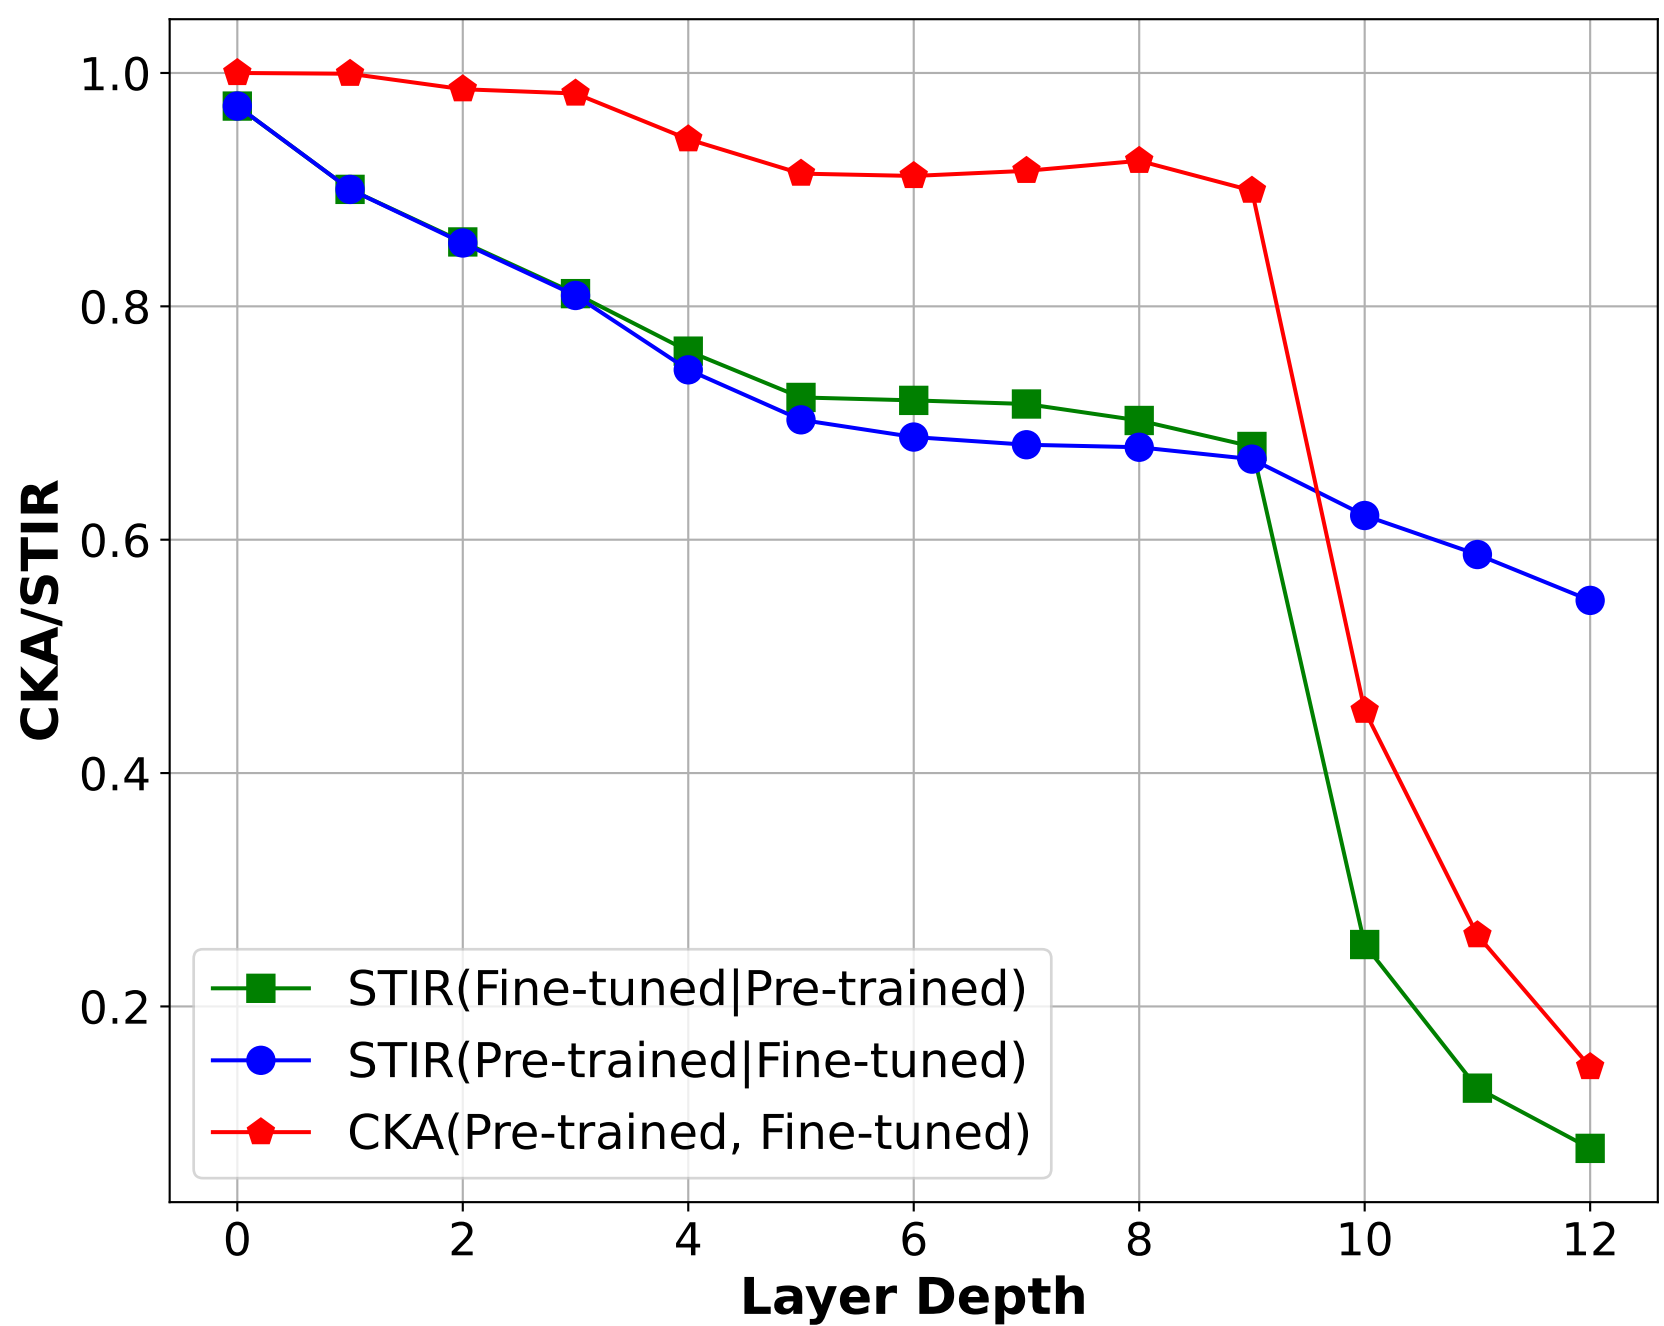

Supplement: supplementary_material [file CoLA CKA STIR.pdf › ICLR2026/Robustness-of-Transformers-models/BERT/CoLA/CoLA CKA STIR.pdf]

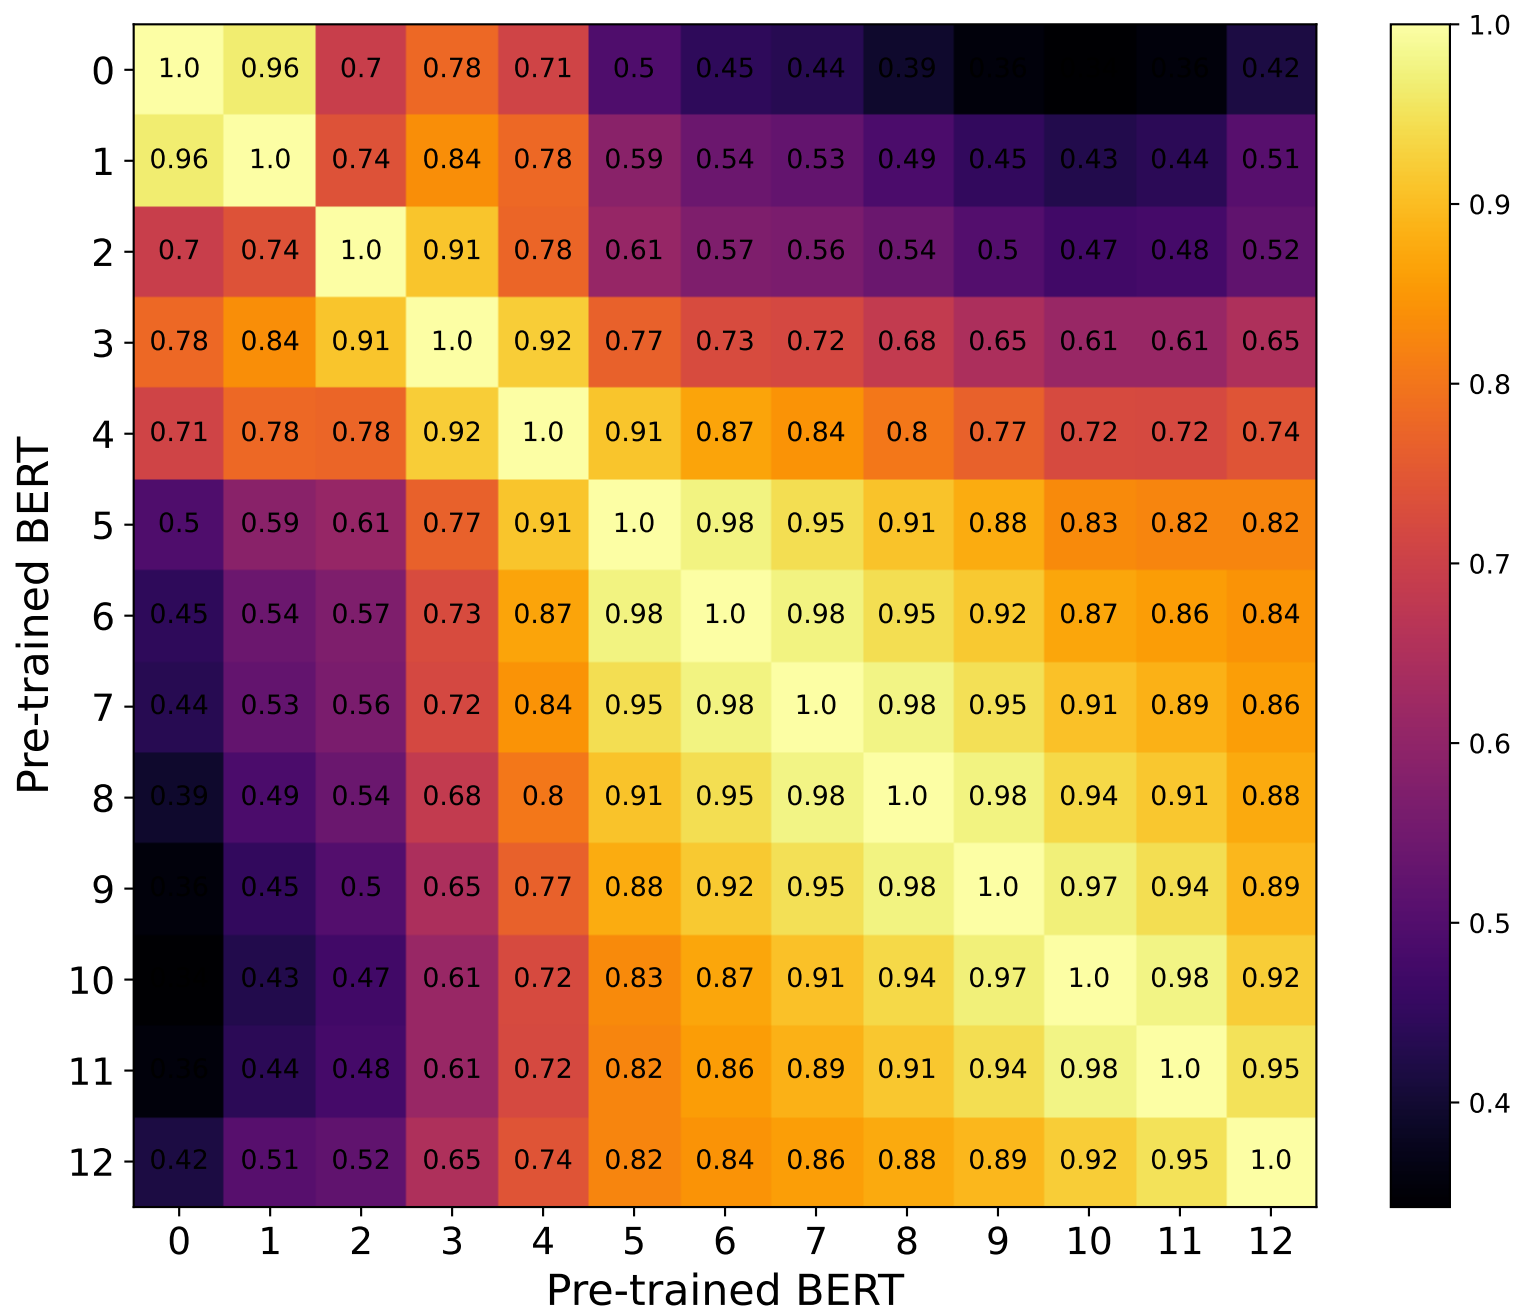

Supplement: supplementary_material [file CoLA_preTrained_preTrained.pdf › ICLR2026/Robustness-of-Transformers-models/BERT/CoLA/CoLA_preTrained_preTrained.pdf]

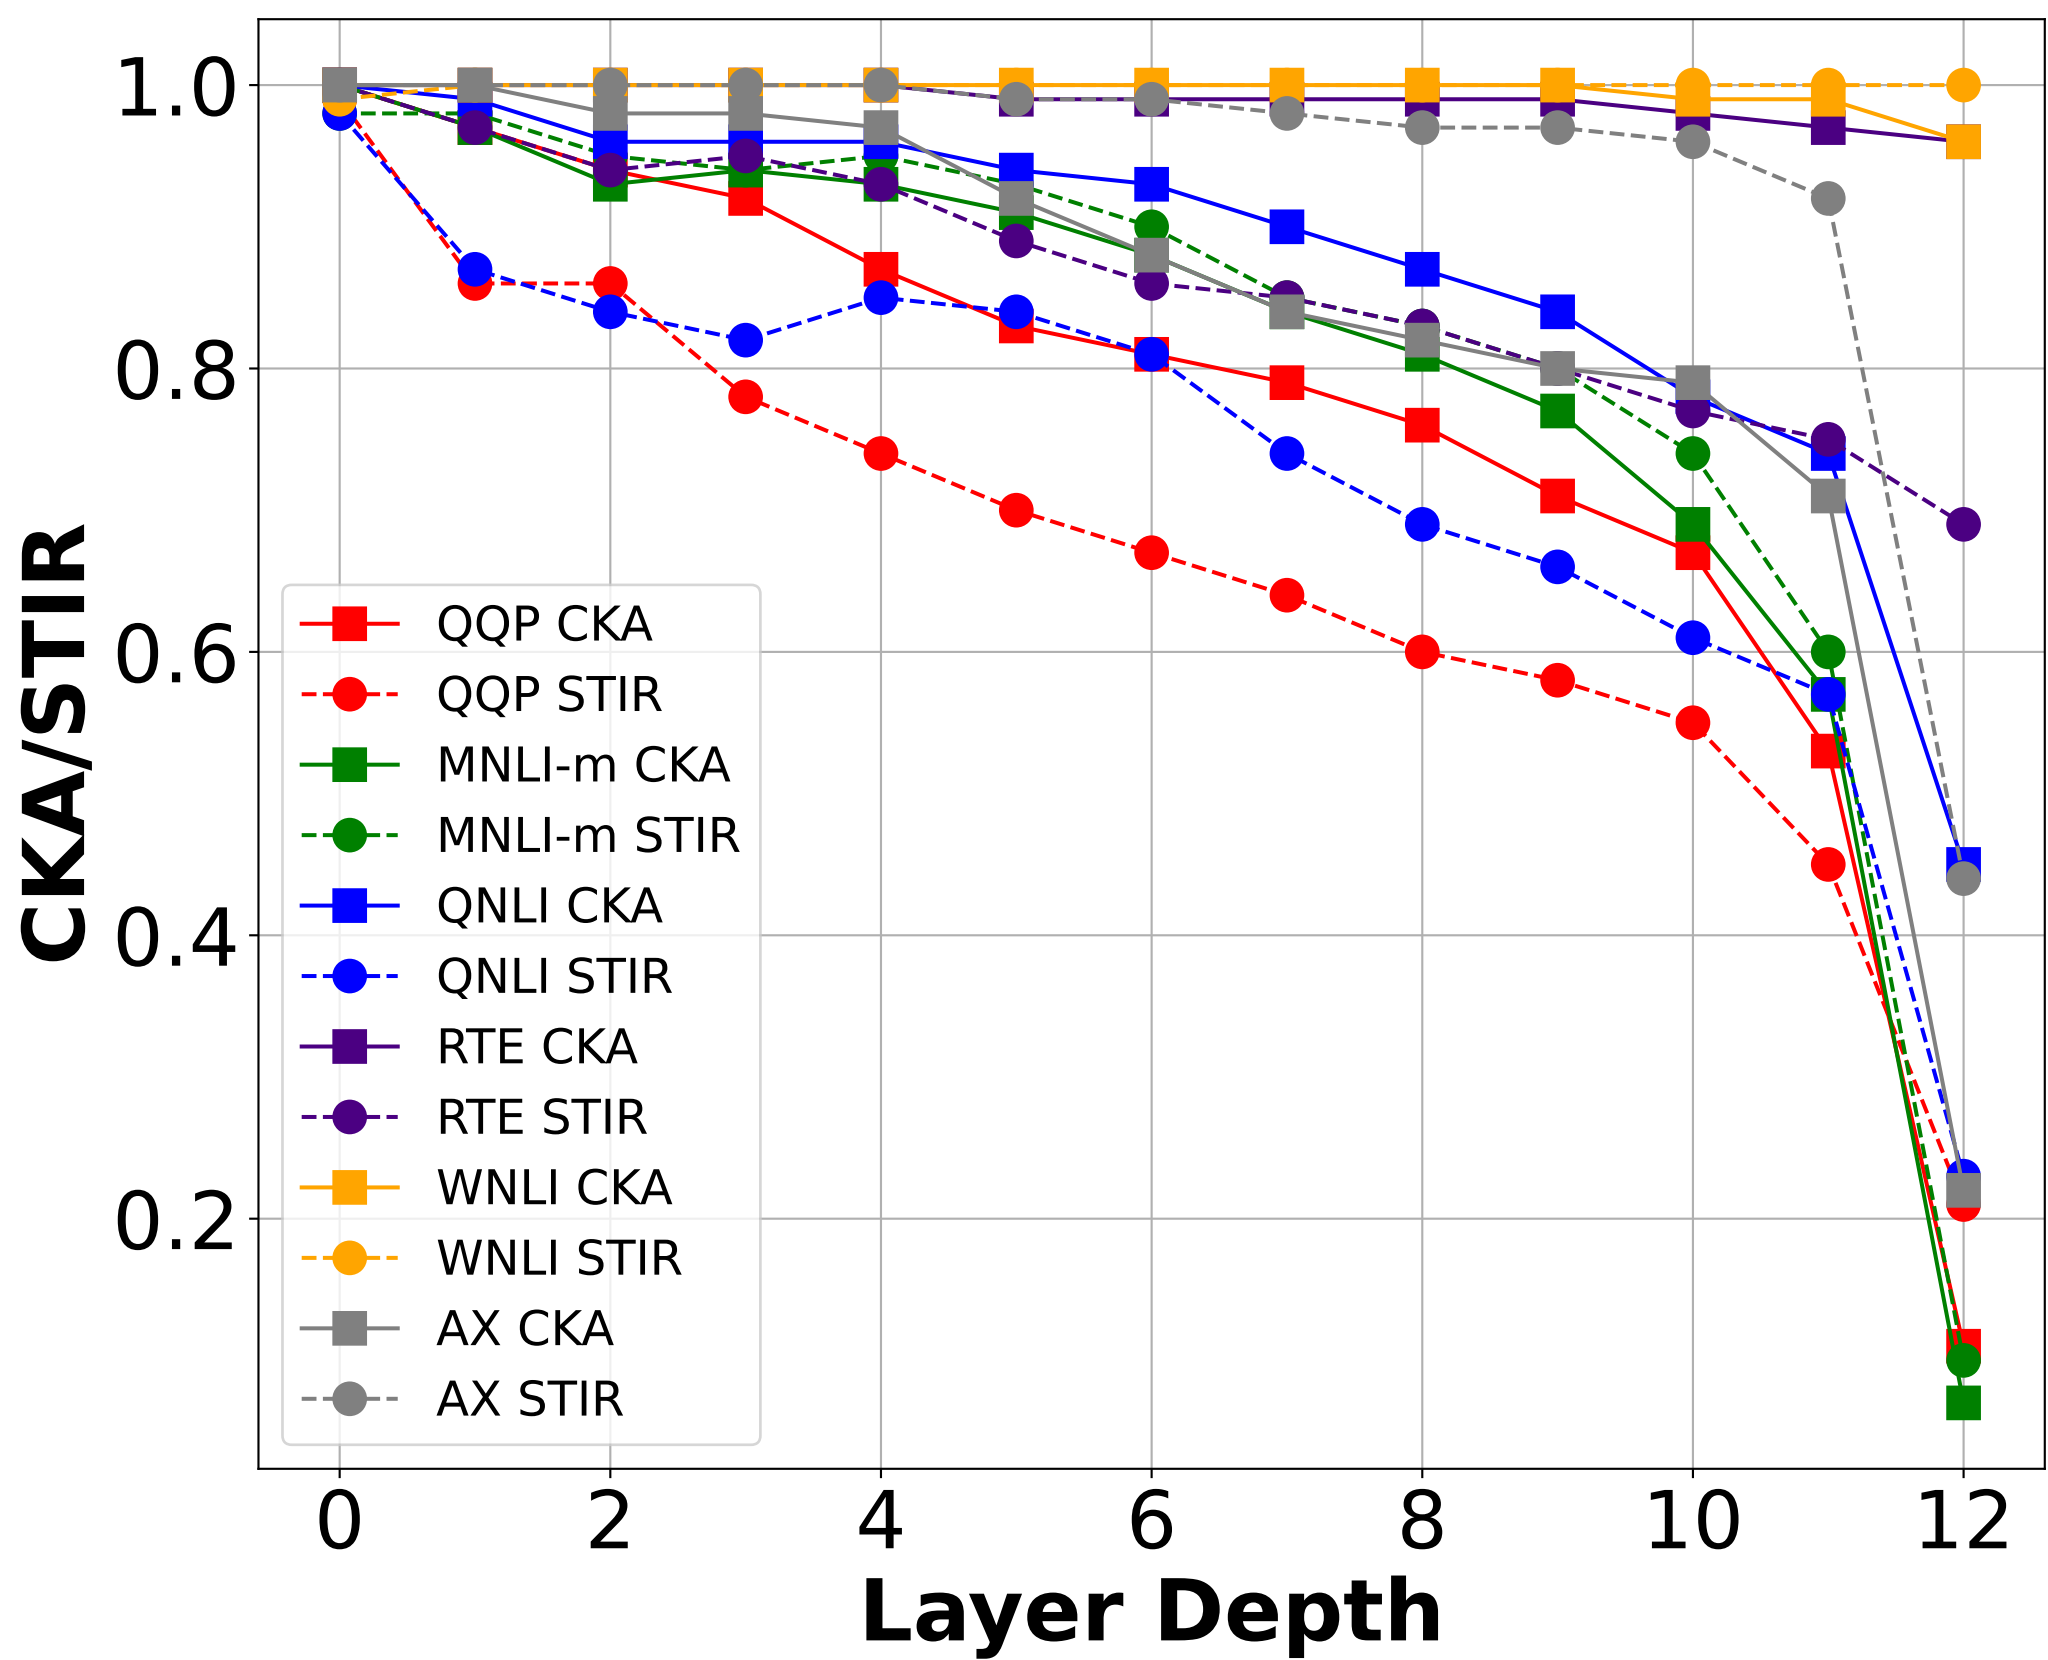

Supplement: supplementary_material [file Inference tasks.pdf › ICLR2026/Robustness-of-Transformers-models/BERT/Inference tasks.pdf]

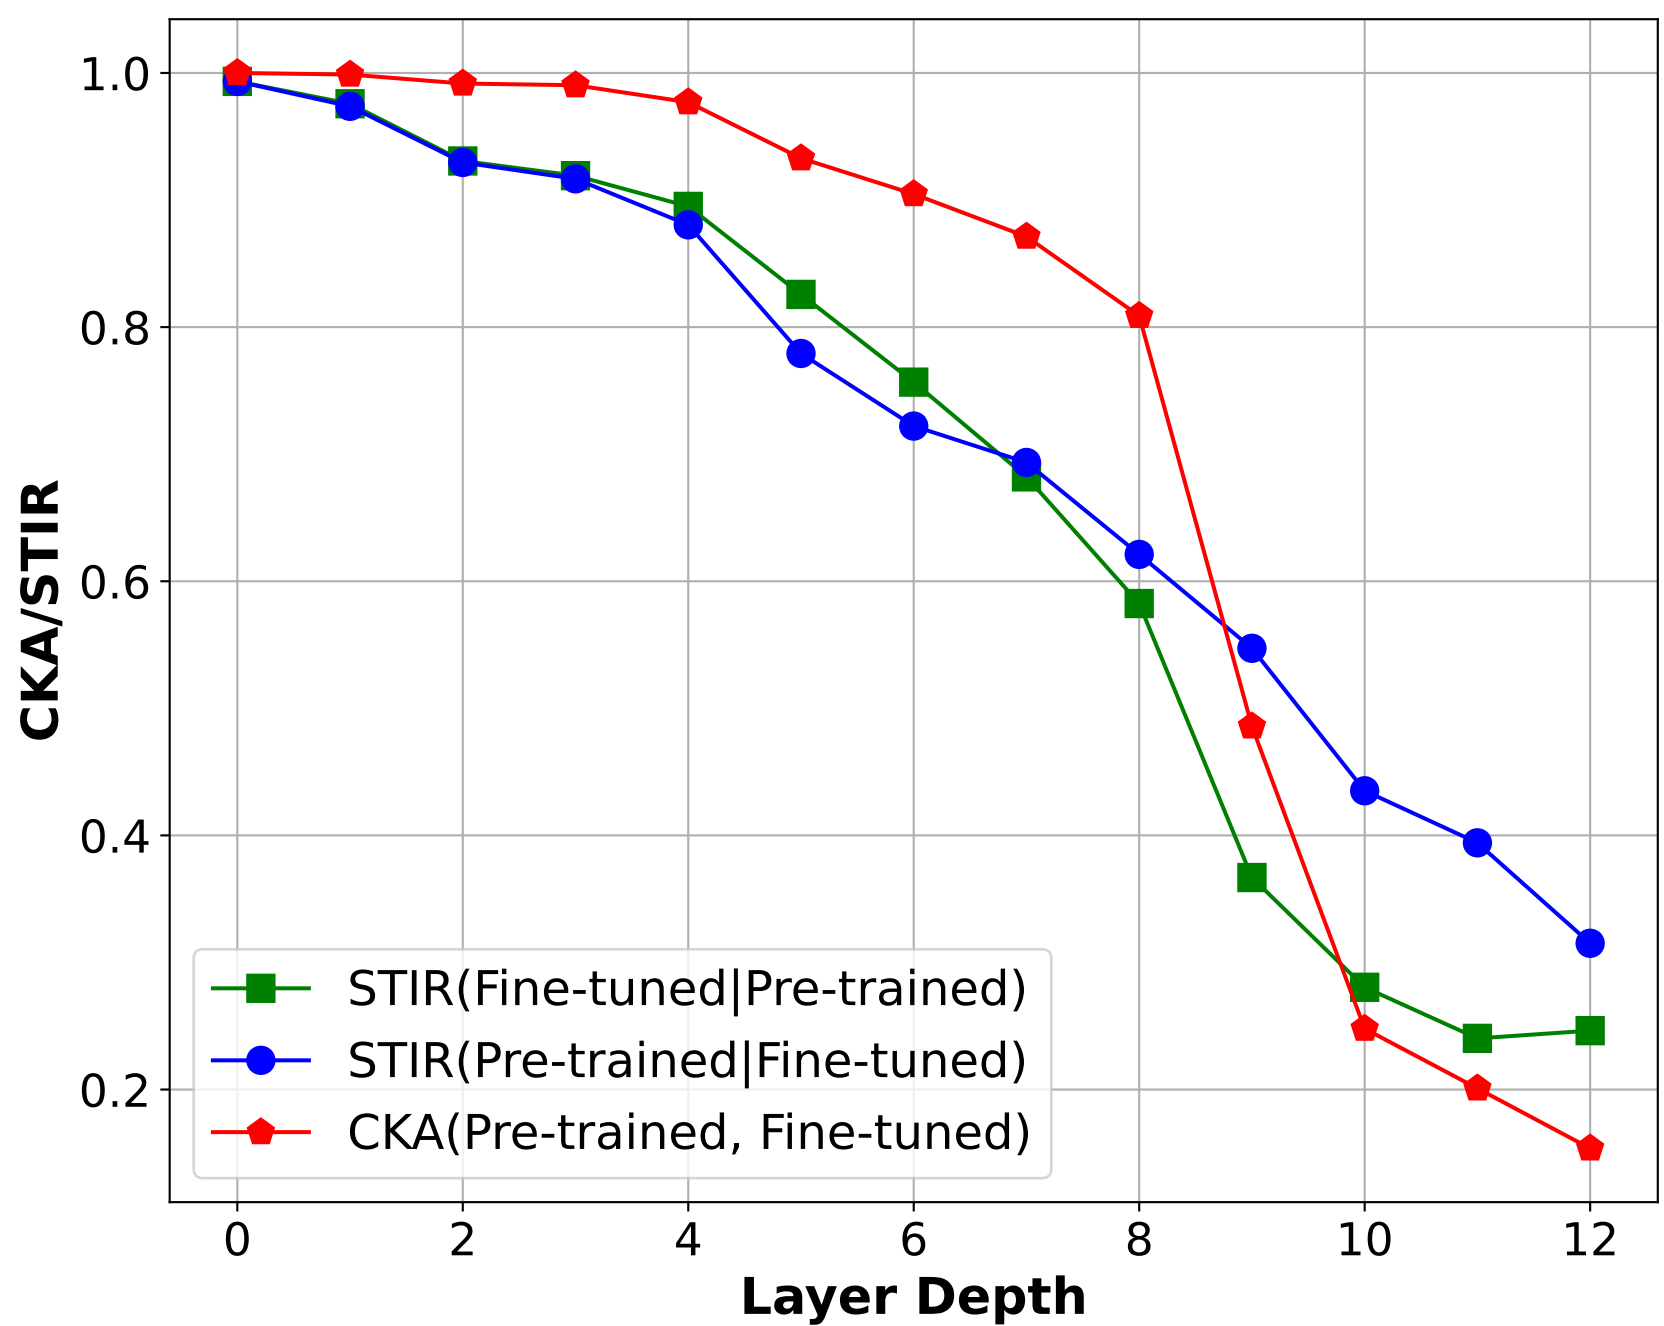

Supplement: supplementary_material [file SST-2 CKA STIR.pdf › ICLR2026/Robustness-of-Transformers-models/BERT/SST-2/SST-2 CKA STIR.pdf]

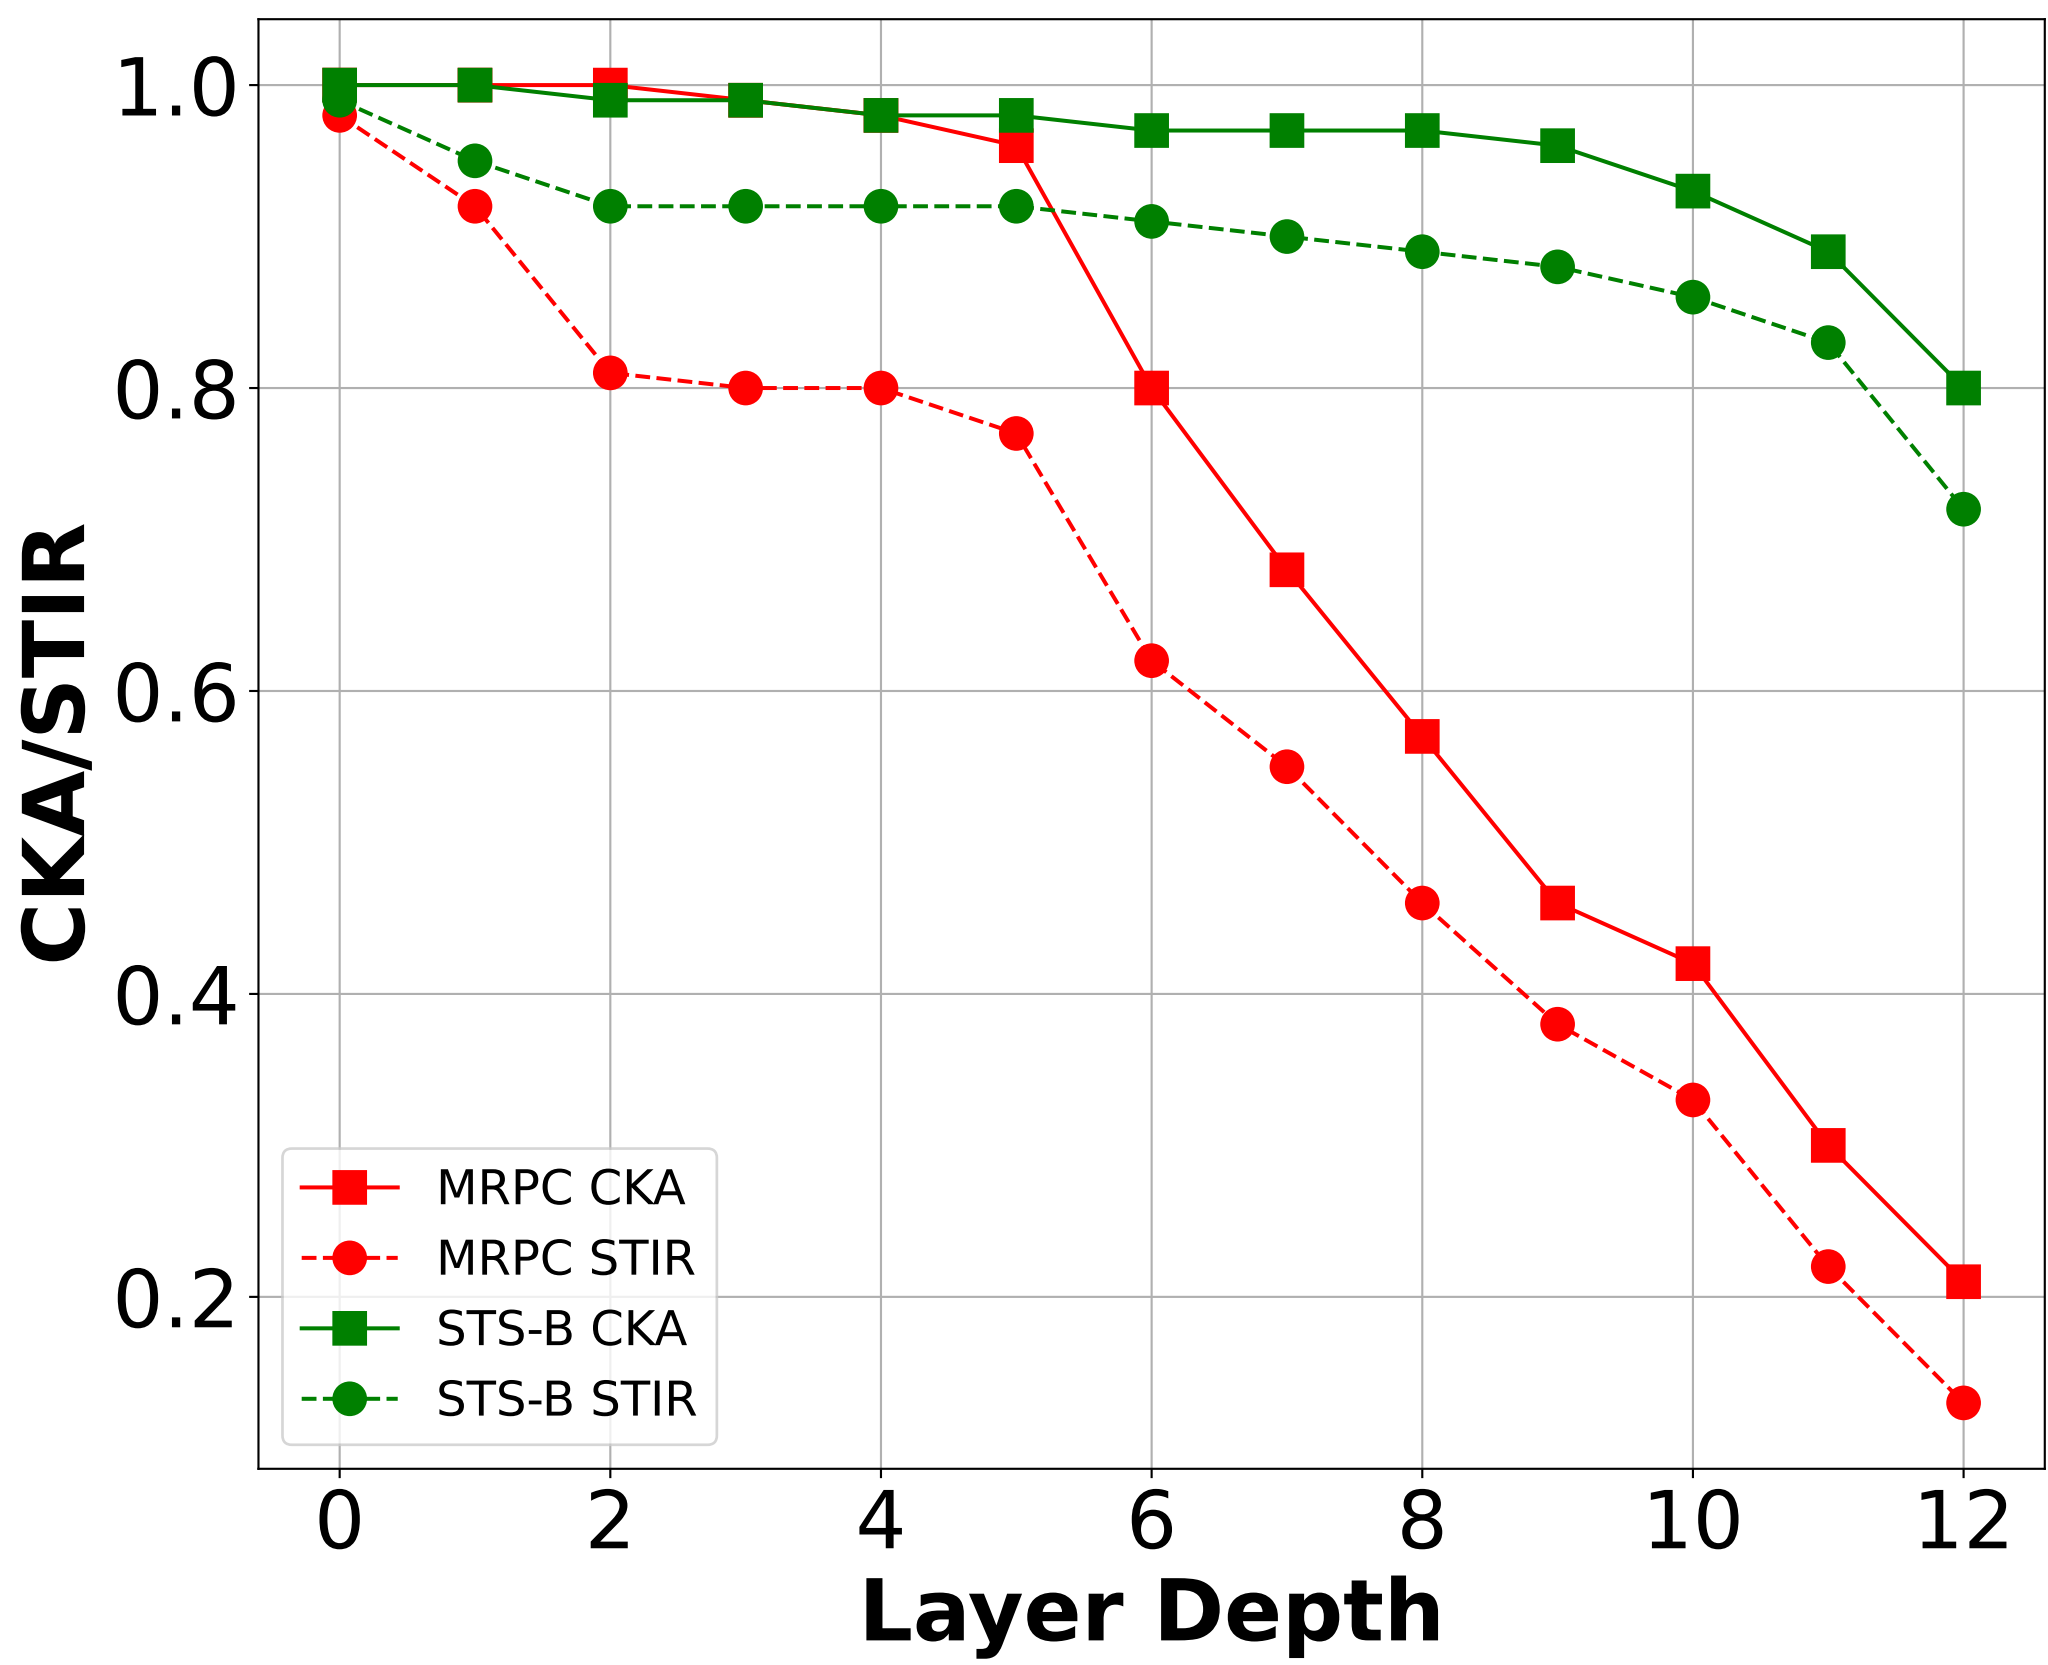

Supplement: supplementary_material [file Similarity tasks.pdf › ICLR2026/Robustness-of-Transformers-models/BERT/Similarity tasks.pdf]

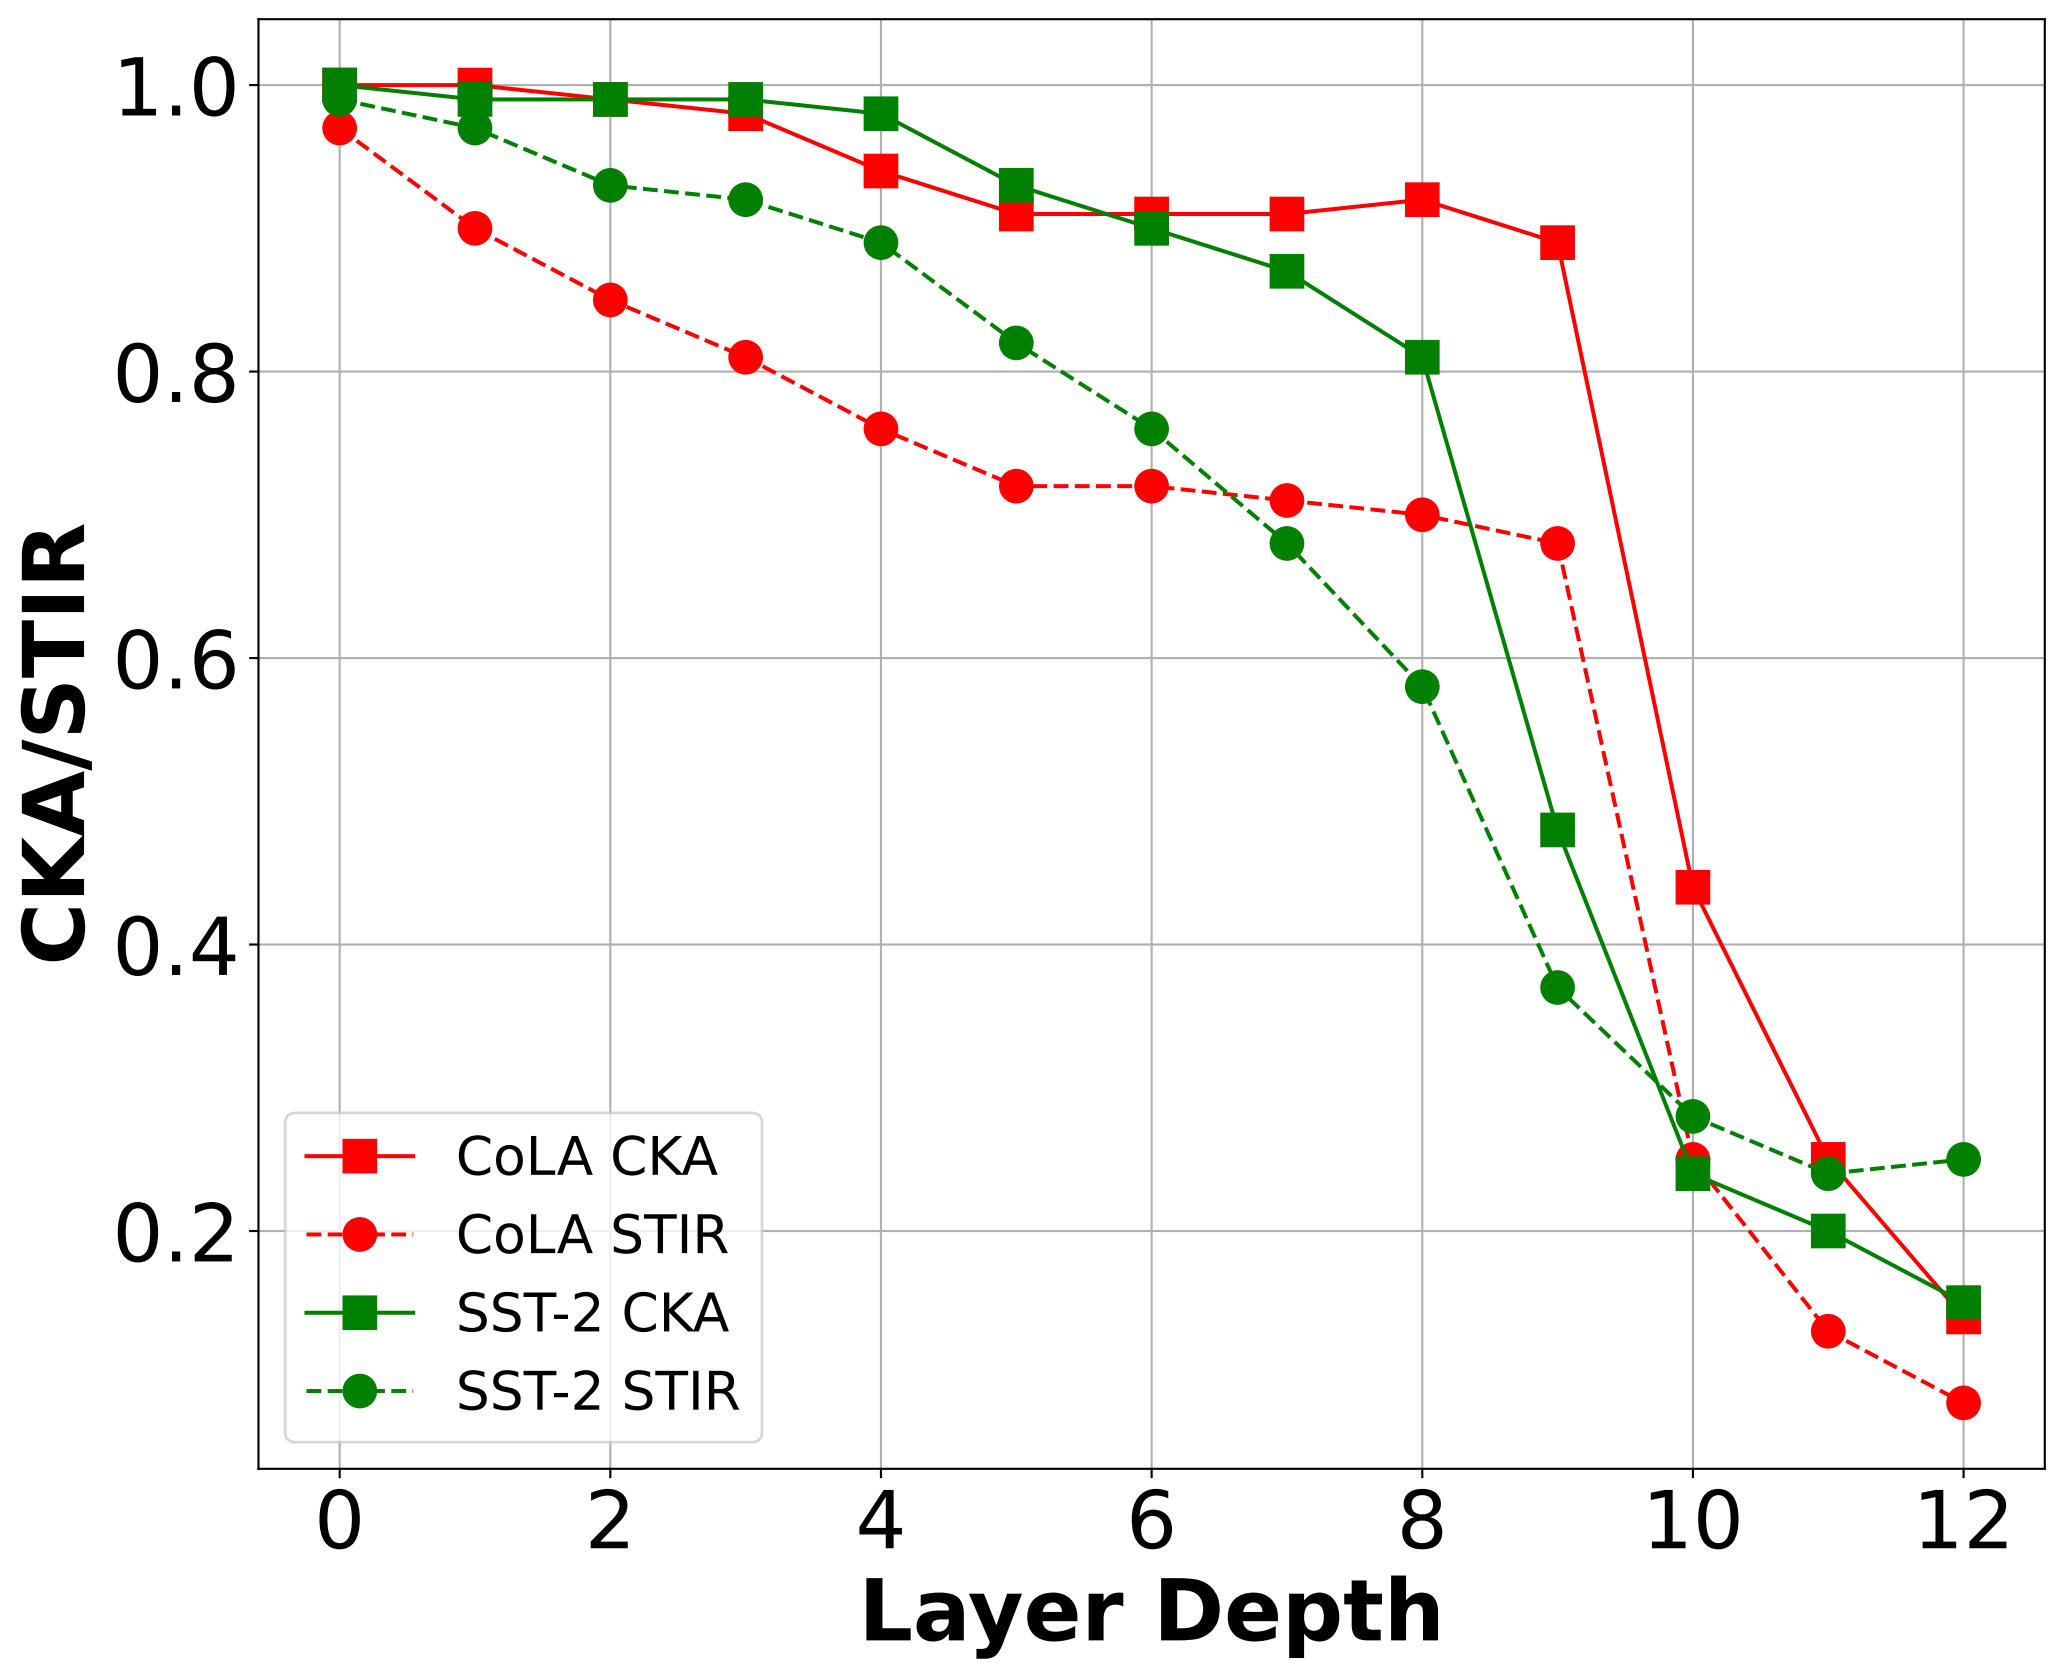

Supplement: supplementary_material [file Single sentence tasks.pdf › ICLR2026/Robustness-of-Transformers-models/BERT/Single sentence tasks.pdf]
